# Supplementary material for: Species Distribution Models as Tools for Community Empowerment and Informed Decision Making in Colombia’s Chocó Pacific Coast Fisheries
Source: MDPI journal article supplement (doi:10.3390/fishes8070349), 2023-07-05
Supplement: s1 [file s1]

# Species Distribution Models as Tools for Community Empowerment and Informed Decision Making in Colombia's Chocó Pacific Coast Fisheries

John Josephraj Selvaraj <sup>1,2,\*</sup>, Maria Alejandra Cifuentes-Ossa <sup>2</sup>, Jeider Penna-Narvaez <sup>2</sup>,  
Maira Alejandra Miranda-Parra <sup>2</sup> and Fabio Andrés Herrera-Rozo <sup>2</sup>

<sup>1</sup> Institute of Pacific Studies, Tumaco Campus, Universidad Nacional de Colombia, Kilómetro 30–31, Cajapí vía Nacional Tumaco-Pasto, Tumaco 528514, Nariño, Colombia

<sup>2</sup> Research Group on Hydrobiological Resources, Faculty of Engineering and Administration, Department of Engineering, Palmira Campus, Universidad Nacional de Colombia, Carrera 32 No. 12-00 Chapinero, vía Candelaria, Palmira 763533, Valle del Cauca, Colombia; macifuentes@unal.edu.co (M.A.C.-O.); jpennan@unal.edu.co (J.P.-N.); mamirandap@unal.edu.co (M.A.M.-P.); fandresherrera@hotmail.com (F.A.H.-R.)

\* Correspondence: jojselvaraj@unal.edu.co

## Performance of individual models by species

**Table S1.** Performance of individual models applied to the species *Acanthocybium solandri*.

| Models            | GLM  | GBM  | GAM  | CTA  | ANN  | FDA  | MARS | RF   | MAXENT |
|-------------------|------|------|------|------|------|------|------|------|--------|
| <b>0 m depth</b>  |      |      |      |      |      |      |      |      |        |
| January           | 0.79 | 0.97 | 0.76 | 0.92 | 0.84 | 0.76 | 0.87 | 1    | 0.68   |
| February          | 0.84 | 0.79 | 0.66 | 0.68 | 0.71 | 0.79 | 0.76 | 0.87 | 0.58   |
| March             | 0.84 | 1    | 0.74 | 0.82 | 0.92 | 0.87 | 0.92 | 1    | 0.76   |
| April             | 0.68 | 0.82 | 0.84 | 0.71 | 0.71 | 0.79 | 0.79 | 0.92 | 0.66   |
| May               | 0.89 | 0.97 | 0.95 | 0.95 | 0.95 | 0.90 | 0.90 | 0.97 | 0.82   |
| June              | 0.76 | 0.92 | 0.76 | 0.66 | 0.79 | 0.82 | 0.82 | 0.92 | 0.47   |
| July              | 0.84 | 0.92 | 1    | 0.84 | 0.92 | 0.90 | 0.92 | 0.95 | 0.82   |
| August            | 0.76 | 0.89 | 0.87 | 0.71 | 0.74 | 0.84 | 0.76 | 0.92 | 0.74   |
| September         | 0.66 | 0.92 | 0.76 | 0.5  | 0.74 | 0.79 | 0.79 | 0.90 | 0.68   |
| October           | 0.68 | 0.95 | 0.76 | 0.82 | 0.90 | 0.76 | 0.87 | 0.95 | 0.53   |
| November          | 0.89 | 0.97 | 0.92 | 0.82 | 0.84 | 0.84 | 0.84 | 0.97 | 0.68   |
| December          | 0.87 | 0.97 | 0.79 | 0.58 | 0.89 | 0.92 | 0.84 | 0.97 | 0.61   |
| <b>22 m depth</b> |      |      |      |      |      |      |      |      |        |
| January           | 0.82 | 0.94 | 0.85 | 0.74 | 0.85 | 0.88 | 0.91 | 0.94 | 0.79   |
| February          | 0.82 | 0.94 | 0.97 | 0.65 | 0.88 | 0.77 | 0.80 | 0.97 | 0.62   |
| March             | 0.76 | 0.91 | 0.94 | 0.82 | 0.97 | 0.91 | 0.91 | 0.94 | 0.53   |
| April             | 0.82 | 0.97 | 0.82 | 0.91 | 1    | 0.97 | 0.88 | 0.94 | 0.71   |
| May               | 0.71 | 0.88 | 0.79 | 0.62 | 0.71 | 0.77 | 0.82 | 0.91 | 0.47   |
| June              | 0.94 | 0.88 | 0.91 | 0.71 | 0.97 | 0.91 | 0.94 | 0.94 | 0.68   |
| July              | 0.91 | 0.94 | 0.94 | 0.76 | 0.91 | 0.79 | 0.77 | 0.94 | 0.68   |
| August            | 0.85 | 0.97 | 0.88 | 0.88 | 0.85 | 0.88 | 0.97 | 1    | 0.74   |
| September         | 0.85 | 0.94 | 0.94 | 0.65 | 0.91 | 0.94 | 0.82 | 0.94 | 0.65   |
| October           | 0.91 | 0.94 | 0.88 | 0.74 | 0.91 | 0.91 | 0.94 | 0.97 | 0.53   |
| November          | 0.77 | 0.94 | 0.79 | 0.88 | 0.85 | 0.85 | 0.74 | 0.97 | 0.68   |
| December          | 0.85 | 0.97 | 0.80 | 0.74 | 0.77 | 0.82 | 0.83 | 0.98 | 0.65   |

| 47 m depth |      |      |      |      |      |      |      |      |      |
|------------|------|------|------|------|------|------|------|------|------|
| January    | 0.82 | 0.95 | 0.86 | 0.77 | 0.68 | 0.81 | 0.86 | 0.95 | 0.41 |
| February   | 0.86 | 0.95 | 0.82 | 0.59 | 0.91 | 0.86 | 0.91 | 0.95 | 0.64 |
| March      | 0.91 | 0.91 | 0.91 | 0.68 | 0.68 | 0.86 | 0.82 | 1    | 0.42 |
| April      | 0.91 | 0.95 | 0.91 | 0.73 | 1    | 0.91 | 0.86 | 1    | 0.77 |
| May        | 0.91 | 0.91 | 0.86 | 0.64 | 0.95 | 0.86 | 0.95 | 0.95 | 0.68 |
| June       | 0.91 | 0.86 | 0.91 | 0.77 | 0.86 | 0.77 | 0.95 | 0.86 | 0.64 |
| July       | 0.91 | 0.95 | 0.86 | 0.95 | 0.95 | 0.91 | 0.86 | 0.95 | 0.77 |
| August     | 0.73 | 0.95 | 0.82 | 0.64 | 0.91 | 0.95 | 0.91 | 0.95 | 0.82 |
| September  | 0.95 | 0.95 | 1    | 0.86 | 0.95 | 0.91 | 0.91 | 0.95 | 0.82 |
| October    | 0.95 | 1    | 0.95 | 0.86 | 0.91 | 0.95 | 0.95 | 1    | 0.82 |
| November   | 0.77 | 0.91 | 0.91 | 0.82 | 0.86 | 0.91 | 0.86 | 1    | 0.68 |
| December   | 0.86 | 0.91 | 0.95 | 0.59 | 0.95 | 0.95 | 0.95 | 0.91 | 0.59 |

**Table S2.** Performance of individual models applied to the species *Scomberomorus sierra*.

| Models     | GLM  | GBM  | GAM  | CTA  | ANN  | FDA  | MARS | RF   | MAXENT |
|------------|------|------|------|------|------|------|------|------|--------|
| 2m depth   |      |      |      |      |      |      |      |      |        |
| January    | 0.92 | 0.96 | 0.95 | 0.94 | 0.94 | 0.92 | 0.94 | 0.97 | 0.88   |
| February   | 0.95 | 0.96 | 0.96 | 0.95 | 0.95 | 0.95 | 0.95 | 0.97 | 0.91   |
| March      | 0.95 | 0.95 | 0.95 | 0.94 | 0.94 | 0.95 | 0.95 | 0.97 | 0.93   |
| April      | 0.95 | 0.96 | 0.95 | 0.96 | 0.95 | 0.94 | 0.95 | 0.97 | 0.94   |
| May        | 0.95 | 0.97 | 0.96 | 0.96 | 0.96 | 0.95 | 0.95 | 0.97 | 0.92   |
| June       | 0.95 | 0.97 | 0.96 | 0.95 | 0.96 | 0.96 | 0.96 | 0.98 | 0.93   |
| July       | 0.95 | 0.96 | 0.97 | 0.94 | 0.96 | 0.96 | 0.97 | 0.97 | 0.93   |
| August     | 0.95 | 0.95 | 0.95 | 0.94 | 0.95 | 0.94 | 0.95 | 0.97 | 0.92   |
| September  | 0.95 | 0.96 | 0.95 | 0.95 | 0.95 | 0.95 | 0.95 | 0.97 | 0.93   |
| October    | 0.95 | 0.96 | 0.96 | 0.95 | 0.95 | 0.95 | 0.96 | 0.97 | 0.92   |
| November   | 0.94 | 0.96 | 0.94 | 0.94 | 0.94 | 0.94 | 0.95 | 0.96 | 0.91   |
| December   | 0.96 | 0.97 | 0.97 | 0.96 | 0.95 | 0.96 | 0.96 | 0.97 | 0.93   |
| 34 m depth |      |      |      |      |      |      |      |      |        |
| January    | 0.93 | 0.95 | 0.91 | 0.91 | 0.95 | 0.93 | 0.94 | 0.96 | 0.91   |
| February   | 0.95 | 0.95 | 0.94 | 0.91 | 0.96 | 0.95 | 0.94 | 0.97 | 0.92   |
| March      | 0.94 | 0.94 | 0.90 | 0.91 | 0.95 | 0.94 | 0.94 | 0.96 | 0.93   |
| April      | 0.95 | 0.95 | 0.95 | 0.90 | 0.95 | 0.94 | 0.93 | 0.97 | 0.89   |
| May        | 0.95 | 0.96 | 0.92 | 0.93 | 0.96 | 0.95 | 0.96 | 0.97 | 0.94   |
| June       | 0.95 | 0.95 | 0.92 | 0.92 | 0.92 | 0.94 | 0.94 | 0.96 | 0.91   |
| July       | 0.94 | 0.94 | NA   | 0.92 | 0.93 | 0.93 | 0.94 | 0.95 | 0.93   |
| August     | 0.95 | 0.96 | 0.95 | 0.95 | 0.95 | 0.95 | 0.96 | 0.97 | 0.94   |
| September  | 0.95 | 0.96 | 0.94 | 0.94 | 0.94 | 0.95 | 0.95 | 0.96 | 0.94   |
| October    | 0.97 | 0.98 | 0.94 | 0.95 | 0.97 | 0.96 | 0.97 | 0.98 | 0.96   |
| November   | 0.95 | 0.95 | 0.92 | 0.94 | 0.94 | 0.94 | 0.95 | 0.96 | 0.94   |
| December   | 0.95 | 0.95 | 0.94 | 0.94 | 0.95 | 0.95 | 0.95 | 0.97 | 0.94   |
| 78 m depth |      |      |      |      |      |      |      |      |        |
| January    | 0.91 | 0.97 | 0.89 | 0.94 | 0.94 | 0.95 | 0.94 | 0.99 | 0.92   |
| February   | 0.87 | 0.96 | 0.90 | 0.89 | 0.92 | 0.83 | 0.91 | 0.98 | 0.90   |
| March      | 0.90 | 1.00 | 0.94 | 0.93 | 0.98 | 0.96 | 0.95 | 1.00 | 0.89   |
| April      | 0.92 | 0.96 | 0.92 | 0.87 | 0.95 | 0.94 | 0.95 | 0.98 | 0.89   |
| May        | 0.95 | 0.96 | 0.82 | 0.93 | 0.92 | 0.95 | 0.92 | 0.97 | 0.80   |
| June       | 0.92 | 0.96 | 0.89 | 0.96 | 0.95 | 0.95 | 0.95 | 0.98 | 0.82   |

|                  |      |      |      |      |      |      |      |      |      |
|------------------|------|------|------|------|------|------|------|------|------|
| <b>July</b>      | 0.94 | 0.98 | 0.90 | 0.96 | 0.95 | 0.94 | 0.97 | 0.99 | 0.96 |
| <b>August</b>    | 0.95 | 0.99 | 0.99 | 0.95 | 0.97 | 0.97 | 0.97 | 1.00 | 0.97 |
| <b>September</b> | 0.96 | 0.98 | 0.90 | 0.96 | 0.95 | 0.96 | 0.97 | 0.99 | 0.97 |
| <b>October</b>   | 0.95 | 0.98 | 0.91 | 0.97 | 0.96 | 0.94 | 0.95 | 0.99 | 0.95 |
| <b>November</b>  | 0.96 | 1.00 | 0.86 | 0.96 | 0.91 | 0.96 | 0.95 | 0.99 | 0.91 |
| <b>December</b>  | 0.95 | 0.97 | 0.94 | 0.92 | 0.97 | 0.96 | 0.92 | 0.99 | 0.92 |

**Table S3.** Performance of individual models applied to the species *Euthynnus lineatus*.

| <b>Models.</b>    | <b>GLM</b> | <b>GBM</b> | <b>GAM</b> | <b>CTA</b> | <b>ANN</b> | <b>FDA</b> | <b>MARS</b> | <b>RF</b> | <b>MAXENT</b> |
|-------------------|------------|------------|------------|------------|------------|------------|-------------|-----------|---------------|
| <b>0 m depth</b>  |            |            |            |            |            |            |             |           |               |
| <b>January</b>    | 0.68       | 0.93       | 0.75       | 0.86       | 0.74       | 0.65       | 0.74        | 0.95      | 0.64          |
| <b>February</b>   | 0.80       | 0.93       | 0.83       | 0.85       | 0.84       | 0.84       | 0.85        | 0.95      | 0.33          |
| <b>March</b>      | 0.74       | 0.91       | 0.79       | 0.73       | 0.86       | 0.84       | 0.83        | 0.95      | 0.79          |
| <b>April</b>      | 0.76       | 0.88       | 0.85       | 0.76       | 0.84       | 0.83       | 0.80        | 0.90      | 0.73          |
| <b>May</b>        | 0.79       | 0.93       | 0.93       | 0.89       | 0.78       | 0.80       | 0.90        | 0.95      | 0.79          |
| <b>June</b>       | 0.79       | 0.95       | 0.85       | 0.86       | 0.83       | 0.88       | 0.90        | 0.95      | 0.78          |
| <b>July</b>       | 0.83       | 0.95       | 0.90       | 0.90       | 0.90       | 0.84       | 0.83        | 0.98      | 0.79          |
| <b>August</b>     | 0.75       | 0.94       | 0.88       | 0.80       | 0.85       | 0.83       | 0.81        | 0.95      | 0.79          |
| <b>September</b>  | 0.70       | 0.89       | 0.85       | 0.75       | 0.73       | 0.81       | 0.80        | 0.95      | 0.49          |
| <b>October</b>    | 0.69       | 0.88       | 0.78       | 0.79       | 0.78       | 0.84       | 0.75        | 0.95      | 0.70          |
| <b>November</b>   | 0.74       | 0.85       | 0.83       | 0.76       | 0.76       | 0.79       | 0.81        | 0.88      | 0.78          |
| <b>December</b>   | 0.76       | 0.94       | 0.88       | 0.76       | 0.91       | 0.88       | 0.88        | 0.99      | 0.75          |
| <b>22 m depth</b> |            |            |            |            |            |            |             |           |               |
| <b>January</b>    | 0.68       | 0.90       | 0.81       | 0.73       | 0.84       | 0.81       | 0.90        | 0.92      | 0.71          |
| <b>February</b>   | 0.77       | 0.87       | 0.79       | 0.76       | 0.68       | 0.79       | 0.81        | 0.89      | 0.66          |
| <b>March</b>      | 0.76       | 0.94       | 0.92       | 0.85       | 0.84       | 0.89       | 0.87        | 0.95      | 0.76          |
| <b>April</b>      | 0.74       | 0.86       | 0.81       | 0.79       | 0.74       | 0.81       | 0.77        | 0.89      | 0.68          |
| <b>May</b>        | 0.68       | 0.81       | 0.66       | 0.66       | 0.61       | 0.69       | 0.69        | 0.86      | 0.60          |
| <b>June</b>       | 0.77       | 0.97       | 0.84       | 0.87       | 0.89       | 0.82       | 0.84        | 0.95      | 0.76          |
| <b>July</b>       | 0.82       | 0.92       | 0.89       | 0.86       | 0.89       | 0.92       | 0.90        | 0.92      | 0.81          |
| <b>August</b>     | 0.87       | 0.98       | 0.94       | 0.94       | 0.97       | 0.94       | 0.94        | 0.95      | 0.89          |
| <b>September</b>  | 0.73       | 0.84       | 0.84       | 0.69       | 0.76       | 0.77       | 0.82        | 0.89      | 0.68          |
| <b>October</b>    | 0.77       | 0.92       | 0.89       | 0.86       | 0.84       | 0.97       | 0.94        | 0.92      | 0.74          |
| <b>November</b>   | 0.89       | 0.95       | 0.84       | 0.84       | 0.85       | 0.82       | 0.84        | 0.98      | 0.74          |
| <b>December</b>   | 0.84       | 0.94       | 0.89       | 0.82       | 0.82       | 0.76       | 0.79        | 0.92      | 0.73          |
| <b>47 m depth</b> |            |            |            |            |            |            |             |           |               |
| <b>January</b>    | 0.78       | 0.93       | 0.85       | 0.83       | 0.78       | 0.83       | 0.85        | 0.95      | 0.63          |
| <b>February</b>   | 0.60       | 0.90       | 0.80       | 0.83       | 0.80       | 0.68       | 0.75        | 1.00      | 0.65          |
| <b>March</b>      | 0.60       | 0.90       | 0.85       | 0.73       | 0.83       | 0.78       | 0.78        | 0.93      | 0.58          |
| <b>April</b>      | 0.73       | 0.93       | 0.78       | 0.75       | 0.73       | 0.73       | 0.68        | 0.93      | 0.65          |
| <b>May</b>        | 0.68       | 0.90       | 0.78       | 0.50       | 0.83       | 0.88       | 0.75        | 0.93      | 0.48          |
| <b>June</b>       | 0.68       | 0.90       | 0.83       | 0.70       | 0.70       | 0.78       | 0.78        | 0.90      | 0.65          |
| <b>July</b>       | 0.65       | 0.83       | 0.75       | 0.48       | 0.83       | 0.70       | 0.65        | 0.88      | 0.50          |
| <b>August</b>     | 0.58       | 0.73       | 0.78       | 0.63       | 0.70       | 0.73       | 0.73        | 0.80      | 0.38          |
| <b>September</b>  | 0.75       | 0.90       | 0.65       | 0.75       | 0.75       | 0.85       | 0.88        | 0.93      | 0.65          |
| <b>October</b>    | 0.68       | 0.88       | 0.83       | 0.88       | 0.83       | 0.80       | 0.80        | 0.88      | 0.70          |
| <b>November</b>   | 0.75       | 0.88       | 0.70       | 0.65       | 0.68       | 0.70       | 0.68        | 0.85      | 0.73          |
| <b>December</b>   | 0.73       | 0.88       | 0.80       | 0.90       | 0.85       | 0.98       | 0.88        | 0.88      | 0.58          |

**Table S4.** Performance of individual models applied to the Species *Thunnus albacares*.

| Models             | GLM  | GBM  | GAM  | CTA  | ANN  | FDA  | MARS | RF   | MAXENT |
|--------------------|------|------|------|------|------|------|------|------|--------|
| <b>0 m depth</b>   |      |      |      |      |      |      |      |      |        |
| January            | 0.83 | 0.88 | 0.86 | 0.85 | 0.89 | 0.85 | 0.84 | 0.91 | 0.86   |
| February           | 0.84 | 0.89 | 0.88 | 0.86 | 0.87 | 0.88 | 0.87 | 0.92 | 0.83   |
| March              | 0.88 | 0.89 | 0.87 | 0.88 | 0.89 | 0.89 | 0.88 | 0.92 | 0.82   |
| April              | 0.85 | 0.91 | 0.88 | 0.87 | 0.89 | 0.87 | 0.88 | 0.93 | 0.85   |
| May                | 0.88 | 0.92 | 0.89 | 0.90 | 0.89 | 0.89 | 0.89 | 0.93 | 0.87   |
| June               | 0.85 | 0.91 | 0.87 | 0.89 | 0.87 | 0.88 | 0.86 | 0.91 | 0.83   |
| July               | 0.85 | 0.89 | 0.89 | 0.84 | 0.88 | 0.87 | 0.88 | 0.92 | 0.83   |
| August             | 0.89 | 0.91 | 0.89 | 0.87 | 0.88 | 0.88 | 0.89 | 0.93 | 0.78   |
| September          | 0.85 | 0.89 | 0.87 | 0.86 | 0.87 | 0.87 | 0.88 | 0.92 | 0.80   |
| October            | 0.86 | 0.92 | 0.92 | 0.90 | 0.88 | 0.90 | 0.89 | 0.95 | 0.72   |
| November           | 0.87 | 0.92 | 0.89 | 0.91 | 0.89 | 0.89 | 0.89 | 0.93 | 0.80   |
| December           | 0.88 | 0.90 | 0.88 | 0.88 | 0.88 | 0.88 | 0.88 | 0.92 | 0.83   |
| <b>110 m depth</b> |      |      |      |      |      |      |      |      |        |
| January            | 0.75 | 0.84 | 0.72 | 0.73 | 0.84 | 0.82 | 0.83 | 0.86 | 0.48   |
| February           | 0.84 | 0.90 | 0.84 | 0.82 | 0.84 | 0.88 | 0.84 | 0.90 | 0.72   |
| March              | 0.76 | 0.89 | 0.78 | 0.80 | 0.84 | 0.82 | 0.81 | 0.90 | 0.82   |
| April              | 0.82 | 0.89 | 0.69 | 0.81 | 0.80 | 0.82 | 0.78 | 0.88 | 0.78   |
| May                | 0.73 | 0.84 | 0.75 | 0.77 | 0.76 | 0.80 | 0.84 | 0.92 | 0.75   |
| June               | 0.80 | 0.88 | 0.75 | 0.76 | 0.82 | 0.83 | 0.80 | 0.88 | 0.73   |
| July               | 0.84 | 0.89 | 0.74 | 0.84 | 0.77 | 0.82 | 0.84 | 0.92 | 0.82   |
| August             | 0.81 | 0.90 | 0.70 | 0.83 | 0.77 | 0.85 | 0.81 | 0.91 | 0.80   |
| September          | 0.83 | 0.92 | 0.80 | 0.82 | 0.72 | 0.84 | 0.86 | 0.93 | 0.82   |
| October            | 0.83 | 0.92 | 0.88 | 0.76 | 0.67 | 0.82 | 0.85 | 0.92 | 0.80   |
| November           | 0.80 | 0.88 | 0.72 | 0.78 | 0.77 | 0.82 | 0.81 | 0.92 | 0.80   |
| December           | 0.73 | 0.89 | 0.78 | 0.77 | 0.68 | 0.82 | 0.82 | 0.90 | 0.75   |
| <b>222 m depth</b> |      |      |      |      |      |      |      |      |        |
| January            | 0.71 | 0.81 | 0.69 | 0.72 | 0.76 | 0.78 | 0.74 | 0.83 | 0.71   |
| February           | 0.86 | 0.88 | 0.74 | 0.76 | 0.86 | 0.90 | 0.83 | 0.86 | 0.74   |
| March              | 0.71 | 0.78 | 0.72 | 0.62 | 0.74 | 0.69 | 0.74 | 0.78 | 0.59   |
| April              | 0.83 | 0.76 | 0.74 | 0.64 | 0.57 | 0.76 | 0.78 | 0.78 | 0.64   |
| May                | 0.71 | 0.76 | 0.64 | 0.64 | 0.72 | 0.74 | 0.72 | 0.79 | 0.71   |
| June               | 0.76 | 0.83 | 0.59 | 0.55 | 0.69 | 0.64 | 0.67 | 0.85 | 0.76   |
| July               | 0.81 | 0.86 | 0.79 | 0.81 | 0.74 | 0.81 | 0.79 | 0.85 | 0.79   |
| August             | 0.72 | 0.81 | 0.62 | 0.60 | 0.69 | 0.72 | 0.72 | 0.79 | 0.78   |
| September          | 0.76 | 0.74 | 0.67 | 0.67 | 0.78 | 0.71 | 0.72 | 0.85 | 0.74   |
| October            | 0.79 | 0.83 | 0.72 | 0.62 | 0.62 | 0.78 | 0.76 | 0.79 | 0.71   |
| November           | 0.81 | 0.86 | 0.71 | 0.78 | 0.72 | 0.79 | 0.85 | 0.88 | 0.71   |
| December           | 0.69 | 0.76 | 0.69 | 0.72 | 0.69 | 0.69 | 0.76 | 0.76 | 0.62   |
